# Supplementary material for: A discrete parasubthalamic nucleus subpopulation plays a critical role in appetite suppression
Source: eLife. 2022 May 4;11:e75470. doi: 10.7554/eLife.75470 (PMC9119672; doi:10.7554/eLife.75470)
Supplement: Figure 2—source data 1. [file elife-75470-fig2-data1.xlsx]

## Sheet: Sheet1
Figure 2E
	Tac1	Crh
Mouse 1	98.8	97.4
Mouse 2	97	99.1
Mouse 3	99.5	99.1
Mouse 4	100	100
Figure 2G
	Tac1	Crh
Mouse 1	73.7	66.4
Mouse 2	58	77.4
Mouse 3	66.5	57.3
Mouse 4	59	63
Figure 2I
	Tac1	Crh
Mouse 1	76.6	47.1
Mouse 2	64	55.8
Mouse 3	66	42.9
Mouse 4	79.9	61.7
Figure 2K
	Tac1	Crh
Mouse 1	1.2	0.4
Mouse 2	1.9	1.4
Mouse 3	0.3	0.2
Mouse 4	1.8	1.7
