# Supplementary material for: A discrete parasubthalamic nucleus subpopulation plays a critical role in appetite suppression
Source: eLife. 2022 May 4;11:e75470. doi: 10.7554/eLife.75470 (PMC9119672; doi:10.7554/eLife.75470)
Supplement: Figure 3—source data 1. [file elife-75470-fig3-data1.xlsx]

## Sheet: Sheet1
Figure 3C
	Food deprived				Refed
	Mouse 1	Mouse 2	Mouse 3	Mouse 4	Mouse 1	Mouse 2	Mouse 3	Mouse 4
Tac1	8	8.08	9.41	14.45	69.58	60.02	69.76	59.62
Crh	14.36	11.2	14.08	16.67	95	85	87.5	80.78
Figure 3D
	Mouse 1	Mouse 2	Mouse 3	Mouse 4
Tac1	979	725	736	651
Crh	304	416	322	206
Figure 3K
	FD Chow	AL Chow	FD Peanut	AL Peanut	FD Object	AL Object	Water		FD=Food deprived
Mouse 1	0.137	0.0413	0.086	0.0521	0.007	0.026	0.005		AL=Ad libitum
Mouse 2	0.113	0.0374	0.084	0.0626	0.0023	0.01	0.0031
Mouse 3	0.082	0.0562	0.137	0.0311	0.001	0.024	0.0165
Mouse 4	0.132	0.0441	0.112	0.0715	0.029	0.001	0.0227
Mouse 5	0.097	0.0315	0.107	0.0482	0.015	0.0214	0.0283
Mouse 6	0.101	0.0588	0.075	0.0491	0.002	0.017	0.0115
Figure 3L
	FD Chow	AL Chow	FD Peanut	AL Peanut	FD Object	AL Object	Water
Mouse 1	1.975	0.9621	4.562	2.015	0.832	0.776	0.432
Mouse 2	2.254	0.788	2.015	1.672	0.733	0.357	0.778
Mouse 3	2.782	1.021	3.562	1.421	0.527	0.578	0.213
Mouse 4	3.365	2.217	3.019	1.13	0.331	0.383	0.662
Mouse 5	4.352	2.01	2.962	0.992	0.662	0.0283	0.891
Mouse 6	3.562	1.546	3.885	2.316	0.783	0.669	0.569
