# Supplementary material for: A discrete parasubthalamic nucleus subpopulation plays a critical role in appetite suppression
Source: eLife. 2022 May 4;11:e75470. doi: 10.7554/eLife.75470 (PMC9119672; doi:10.7554/eLife.75470)
Supplement: Figure 4—source data 1. [file elife-75470-fig4-data1.xlsx]

## Sheet: Sheet1
Figure 4E
	Saline				Amylin				CCK				PYY
	Mouse 1	Mouse 2	Mouse 3	Mouse 4	Mouse 1	Mouse 2	Mouse 3	Mouse 4	Mouse 1	Mouse 2	Mouse 3	Mouse 4	Mouse 1	Mouse 2	Mouse 3	Mouse 4
Tac1	6.08	7.78	6.24	6.94	19.7	17.15	25.52	14.28	29.63	37.9	26.81	16.54	43.1	28.28	31.31	25.45
CRH	10.04	8.59	7.96	4.59	22.83	21.05	40	27.78	18.79	20.9	15	22.22	29.55	30.61	35.4	23.59
Figure 4K
	Saline	Amylin	CCK	PYY
Mouse 1	0.0237	0.0913	0.0741	0.0613
Mouse 2	0.047	0.07	0.112	0.0851
Mouse 3	0.0214	0.06	0.0678	0.0516
Mouse 4	0.0351	0.0521	0.0663	0.0461
Mouse 5	0.0416	0.0401	0.0851	0.0745
Mouse 6	0.0113	0.0612	0.0561	0.0471
Figure 4L
	Saline	Amylin	CCK	PYY
Mouse 1	0.451	1.136	1.375	1.63
Mouse 2	0.72	1.452	1.883	1.26
Mouse 3	0.113	0.89	1.15	0.91
Mouse 4	0.272	0.992	1.0005	0.84
Mouse 5	0.361	1.44	0.999	1.88
Mouse 6	0.4461	1.26	1.75	1.375
