# Supplementary material for: A discrete parasubthalamic nucleus subpopulation plays a critical role in appetite suppression
Source: eLife. 2022 May 4;11:e75470. doi: 10.7554/eLife.75470 (PMC9119672; doi:10.7554/eLife.75470)
Supplement: Figure 5—source data 1. [file elife-75470-fig5-data1.xlsx]

## Sheet: Sheet1
Figure 5D
	mCherry						hM4Di-mCherry
Time	Mouse 1	Mouse 2	Mouse 3	Mouse 4	Mouse 5	Mouse 6	Mouse 1	Mouse 2	Mouse 3	Mouse 4	Mouse 5	Mouse 6
0	0	0	0	0	0	0	0	0	0	0	0	0
15	0.054	0.0075	0.045	0.092	0.234	0.155	0.0425	0.018	0.33	0.284	0.07	0.036
30	0.306	0.14	0.3475	0.366	0.594	0.24	0.14	0.218	0.64	0.592	0.4075	0.15
45	0.486	0.675	0.565	0.82	0.93	0.71	0.4475	0.49	0.83	0.74	0.9475	0.49
60	0.676	0.7175	0.735	1.1	1.428	0.7875	0.74	0.516	1.254	1.234	1.08	1.06
75	1.18	1.2775	1.18	1.492	1.656	1.38	0.905	0.73	1.718	1.346	1.9425	1.206
90	1.366	1.715	1.36	1.866	2.184	1.6025	1.1125	1.014	2.136	2.026	2.165	1.862
105	1.726	1.9425	1.7025	2.306	2.566	1.9175	1.395	1.458	2.442	2.38	2.325	1.95
120	1.966	2.31	2.0925	2.534	2.964	2.34	1.63	1.59	2.976	2.688	3.1525	2.646
135	2.524	2.7425	2.535	2.808	3.354	2.9375	1.8725	1.956	3.222	2.968	3.3725	2.808
150	2.798	2.93	2.9175	3.376	3.94	3.015	2.2125	2.058	3.442	3.412	3.855	3.392
165	3.228	3.675	3.51	3.646	4.406	3.755	2.5	2.58	3.744	3.838	4.5125	3.636
180	3.578	3.8475	3.8025	4.216	4.506	3.9275	2.77	2.812	4.102	4.154	4.6475	3.954
195	4.036	4.2175	4.1225	4.518	5.258	4.075	3.0375	3.164	4.33	4.378	5.4325	4.262
210	4.32	4.57	4.4475	4.87	5.794	5.0625	3.4425	3.424	4.876	4.746	5.625	4.532
Figure 5E
	mCherry						hM4Di-mCherry
Time	Mouse 1	Mouse 2	Mouse 3	Mouse 4	Mouse 5	Mouse 6	Mouse 1	Mouse 2	Mouse 3	Mouse 4	Mouse 5	Mouse 6
0	0	0	0	0	0	0	0	0	0	0	0	0
15	-0.016	-0.02	0.008	0.038	0.144	0.36	0.008	0.038	0.394	0.254	0.05	0.052
30	0.026	-0.032	2.7756e-18	0.032	0.192	0.434	0.062	0.07	0.624	0.534	0.056	0.05
45	0.034	-0.044	1.3878e-18	0.032	0.248	0.516	0.07	0.126	0.804	0.654	0.186	0.056
60	0.132	0.022	-0.004	0.05	0.262	0.62	0.23	0.138	1.028	0.92	0.186	0.044
75	0.142	0.018	-0.002	0.048	0.358	0.66	0.358	0.212	1.202	1.168	0.206	0.112
90	0.128	0.076	-0.004	0.046	0.438	0.648	0.548	0.27	1.416	1.558	0.464	0.126
105	0.284	0.138	-0.008	0.152	0.598	0.702	0.752	0.414	1.688	1.864	0.482	0.248
120	0.376	0.352	0.046	0.322	0.686	0.928	1.084	0.54	2.096	2.172	0.638	0.314
135	0.48	0.466	0.26	0.358	0.762	1.082	1.346	0.914	2.542	2.664	0.902	0.496
150	0.794	0.738	0.77	0.49	0.934	1.098	1.6	1.114	2.876	2.874	1.012	0.942
165	1.026	1.04	0.762	0.686	1.056	1.31	1.904	1.472	3.224	3.204	1.304	1.212
180	1.336	1.312	0.794	0.86	1.142	1.306	2.26	1.616	3.692	3.78	1.656	1.5
195	1.532	1.558	1.184	1.102	1.418	1.742	2.614	1.948	3.988	4.168	2.156	1.902
210	1.926	1.894	1.462	1.344	1.898	1.978	3.194	2.212	4.618	4.596	2.394	2.276
Figure 5F
	mCherry						hM4Di-mCherry
Time	Mouse 1	Mouse 2	Mouse 3	Mouse 4	Mouse 5	Mouse 6	Mouse 1	Mouse 2	Mouse 3	Mouse 4	Mouse 5	Mouse 6
0	0	0	0	0	0	0	0	0	0	0	0	0
15	-0.0266667	0.002	-0.002	0	0.0433333	0	0.126667	-0.0016667	0.23	0.336	0.012	0
30	-0.0266667	0.12	-0.004	0	0.271667	0.0433333	0.198333	0.05	0.47	0.864	0.026	0.0116667
45	0.065	0.154	0.048	0	0.356667	0.185	0.318333	0.035	0.743333	1.166	0.114	0.095
60	0.0883333	0.274	0.24	0.00166667	0.45	0.326667	0.511667	0.17	1.10833	1.386	0.36	0.206667
75	0.08	0.45	0.332	-0.0016667	0.585	0.321667	0.546667	0.515	1.31833	1.716	0.392	0.203333
90	0.191667	0.596	0.43	0.065	0.768333	0.5	0.608333	0.766667	1.615	1.952	0.642	0.313333
105	0.21	0.78	0.564	0.125	0.985	0.695	0.913333	1.11833	1.72333	2.306	0.784	0.69
120	0.368333	0.91	0.724	0.228333	1.17333	0.805	1.01167	1.22333	2.01833	2.7	0.992	0.771667
135	0.543333	1.17	0.832	0.481667	1.3	0.908333	1.20167	1.49667	2.10333	3.098	1.382	1.08333
150	0.856667	1.384	1.148	0.801667	1.45667	1.07167	1.43667	1.72667	2.44167	3.376	1.58	1.25667
165	1.15833	1.516	1.626	0.963333	1.58667	1.19833	1.76667	2.06333	2.77833	3.578	1.746	1.55167
180	1.37167	1.648	1.726	1.205	1.84333	1.595	1.875	2.145	3.03833	3.92	1.75	1.9
195	1.69667	1.978	2.044	1.65333	2.04167	1.81333	2.02167	2.37167	3.45	4.262	2.194	2.325
210	1.84333	2.36	2.394	1.88	2.2	1.895	2.41333	2.625	3.68167	4.608	2.328	2.53167
Figure 5G
	mCherry						hM4Di-mCherry
Time	Mouse 1	Mouse 2	Mouse 3	Mouse 4	Mouse 5	Mouse 6	Mouse 1	Mouse 2	Mouse 3	Mouse 4	Mouse 5	Mouse 6
0	0	0	0	0	0	0	0	0	0	0	0	0
15	0.03	-0.022	-0.01	0.008	0.166	0.104	0.02	-0.002	0.084	0.222	0.016	0.078
30	0.03	-0.032	-0.016	3.4694e-18	0.168	0.078	0.024	0.03	0.164	0.336	0.024	0.066
45	0.026	-0.042	-0.024	0	0.18	0.166	0.024	0.006	0.256	0.48	0.026	0.052
60	0.042	-0.056	-0.03	-0.004	0.186	0.16	0.02	0.072	0.348	0.478	0.028	0.148
75	0.03	-0.068	-0.042	-0.004	0.19	0.19	0.018	0.094	0.39	0.482	0.014	0.144
90	0.038	-0.08	-0.05	-0.008	0.182	0.214	0.128	0.1	0.394	0.542	0.024	0.132
105	0.032	-0.09	-0.05	-0.006	0.18	0.208	0.26	0.092	0.652	0.726	0.024	0.174
120	0.032	-0.078	-0.06	-0.012	0.174	0.206	0.294	0.202	0.89	0.776	0.012	0.168
135	0.076	-0.084	0.04	0.06	0.164	0.19	0.296	0.312	0.932	0.96	0.02	0.24
150	0.24	-0.094	0.06	0.056	0.164	0.184	0.29	0.346	1.202	1.186	0.096	0.364
165	0.292	-0.106	0.182	0.132	0.156	0.334	0.664	0.478	1.526	1.504	0.266	0.468
180	0.568	-0.106	0.436	0.156	0.144	0.418	0.662	0.586	1.866	1.708	0.4	0.472
195	0.87	-0.112	1.036	0.258	0.144	0.41	0.95	0.882	2.132	1.988	0.618	0.724
210	1.162	0.068	1.372	0.588	0.224	0.62	1.19	1.168	2.386	2.41	0.848	0.794
Figure 5H
	mCherry						hM4Di-mCherry
	Mouse 1	Mouse 2	Mouse 3	Mouse 4	Mouse 5	Mouse 6	Mouse 1	Mouse 2	Mouse 3	Mouse 4	Mouse 5	Mouse 6
Saline	0.454444	0.667083	0.454267	0.558655	0.373798	0.68875	0.318635	0.497488	0.297254	0.253853	0.840714	0.734533
Amylin	0.22575	0.257771	0.529533	0.17425	0.275937	0.3006	0.293143	0.472226	0.247856	0.205298	0.349933	0.301421
CCK	0.304849	0.415694	0.716	0.38375	0.260319	0.388057	0.309464	0.406818	0.281007	0.240221	0.304881	0.476167
PYY	0.2605	0.11	0.326333	0.265	0.130333	0.22	0.379167	0.2925	0.279	0.138722	0.250833	0.204
Figure 5I
	mCherry						hM4Di-mCherry
	Mouse 1	Mouse 2	Mouse 3	Mouse 4	Mouse 5	Mouse 6	Mouse 1	Mouse 2	Mouse 3	Mouse 4	Mouse 5	Mouse 6
Saline	176.513	214.579	149.168	211.104	98.1105	195.05	133.266	174.224	102.067	62.4087	349.013	222.747
Amylin	51.8214	51.3067	133.93	38.55	63.399	124.88	76.1195	177.962	108.301	110.212	99.7933	59.0917
CCK	90.0845	102.417	248.6	92.0278	84.6278	104.941	95.437	174.203	73.0645	55.9231	100.255	118.567
PYY	51.7667	25	101.1	56.5	38	57.4167	107.417	319.125	80.3211	25.3356	48.7708	33.8333
Figure 5J
	mCherry						hM4Di-mCherry
	Mouse 1	Mouse 2	Mouse 3	Mouse 4	Mouse 5	Mouse 6	Mouse 1	Mouse 2	Mouse 3	Mouse 4	Mouse 5	Mouse 6
Saline	2.66667	2.08333	2.83333	2.46667	4.6	1.91667	3	2.33333	3.86667	4.66667	1.91667	1.8
Amylin	1.8	1.53333	0.933333	1.13333	2	1.2	2.46667	2.6	4.26667	5.2	1.43333	1.8
CCK	1.83333	1.2	1	1.05556	1.94444	1.33333	2.94444	2.66667	2.72222	3.26667	1.66667	1.38889
PYY	0.733333	0.0666667	0.533333	0.2	0.533333	0.466667	0.533333	1.6	2.26667	3.26667	0.6	0.8
Figure 5K
	mCherry						hM4Di-mCherry
Time	Mouse 1	Mouse 2	Mouse 3	Mouse 4	Mouse 5	Mouse 6	Mouse 1	Mouse 2	Mouse 3	Mouse 4	Mouse 5	Mouse 6
0	0	0	0	0	0	0	0	0	0	0	0	0
15	0.067	0.263	0.09	0.201	0.041	0.01	0.277	0.191	0.326	0.046	0.076	0.107
30	0.345	0.614	0.289	0.538	0.438	0.295	0.587	0.522	0.711	0.521	0.578	0.318
45	0.863	0.965	0.558	0.829	0.774	0.723	0.847	0.841	1.012	0.871	1.006	0.567
60	1.307	1.251	0.752	1.277	1.144	1.061	1.195	1.312	1.371	1.229	1.353	0.944
75	1.792	1.597	0.984	1.699	1.573	1.367	1.652	1.693	1.659	1.649	1.764	1.181
90	2.094	1.924	1.304	2.016	1.878	1.75	1.986	2.058	2.024	2.08	2.086	1.421
105	2.483	2.189	1.508	2.387	2.272	2.067	2.294	2.435	2.367	2.434	2.482	1.748
120	2.832	2.505	1.764	2.65	2.733	2.527	2.697	2.826	2.655	2.851	2.832	1.98
135	3.357	2.761	2.008	3.031	3.151	2.929	2.992	3.296	3.037	3.306	3.193	2.345
150	3.675	3.149	2.371	3.375	3.623	3.334	3.302	3.724	3.311	3.821	3.57	2.661
165	4.001	3.39	2.707	3.71	3.962	3.777	2.733	4.139	3.679	4.238	3.959	2.947
180	4.378	3.724	3.012	4.027	4.368	4.163	4.129	4.462	4.045	4.636	4.393	3.213
195	4.873	4.002	3.316	4.333	4.73	4.551	4.399	4.783	4.389	5.1	4.768	3.53
210	5.595	4.158	3.485	4.86	5.071	4.912	4.872	5.234	4.736	5.213	5.18	3.762
Figure 5L
	mCherry						hM4Di-mCherry
Time	Mouse 1	Mouse 2	Mouse 3	Mouse 4	Mouse 5	Mouse 6	Mouse 1	Mouse 2	Mouse 3	Mouse 4	Mouse 5	Mouse 6
0	0	0	0	0	0	0	0	0	0	0	0	0
15	0.007	0.048	0.063	0.03	0.032	0.047	0.007	0.087	0.068	0.038	0.037	0.013
30	0.033	0.072	0.116	0.058	0.068	0.08	0.038	0.122	0.094	0.093	0.082	0.041
45	0.088	0.103	0.136	0.083	0.099	0.106	0.082	0.158	0.114	0.126	0.128	0.069
60	0.141	0.158	0.177	0.133	0.135	0.152	0.113	0.206	0.152	0.147	0.174	0.108
75	0.184	0.188	0.23	0.18	0.179	0.197	0.148	0.25	0.189	0.184	0.207	0.153
90	0.232	0.23	0.285	0.23	0.234	0.236	0.178	0.294	0.225	0.221	0.257	0.186
105	0.244	0.2844	0.322	0.269	0.277	0.287	0.204	0.342	0.283	0.237	0.299	0.224
120	0.337	0.459	0.525	0.388	0.428	0.467	0.276	0.362	0.379	0.294	0.406	0.305
135	0.437	0.599	0.742	0.477	0.552	0.587	0.506	0.419	0.642	0.408	0.657	0.439
150	0.51	0.813	0.882	0.586	0.706	0.77	0.716	0.594	0.865	0.54	0.926	0.603
165	0.661	1.095	1.013	0.763	0.769	0.951	0.846	0.684	1.079	0.653	1.079	0.763
180	0.879	1.165	1.221	0.968	1.012	1.321	1.066	0.963	1.254	0.888	1.242	0.974
195	1.144	1.488	1.584	1.304	1.268	1.622	1.279	1.354	1.477	1.095	1.563	1.113
210	1.394	1.683	2.061	1.6	1.624	1.754	1.405	1.991	1.678	1.411	1.821	1.302
Figure 5M
	mCherry						hM4Di-mCherry
Time	Mouse 1	Mouse 2	Mouse 3	Mouse 4	Mouse 5	Mouse 6	Mouse 1	Mouse 2	Mouse 3	Mouse 4	Mouse 5	Mouse 6
0	0	0	0	0	0	0	0	0	0	0	0	0
15	0.058	0.06	0.016	0.053	0.013	0.098	0.009	0.062	0.093	0.051	0.062	0.06
30	0.147	0.101	0.116	0.097	0.189	0.132	0.144	0.124	0.146	0.096	0.107	0.126
45	0.303	0.133	0.259	0.213	0.297	0.152	0.265	0.204	0.238	0.169	0.155	0.231
60	0.363	0.217	0.378	0.319	0.464	0.18	0.355	0.284	0.312	0.254	0.226	0.336
75	0.472	0.254	0.42	0.433	0.508	0.212	0.525	0.381	0.36	0.399	0.282	0.436
90	0.559	0.294	0.489	0.494	0.683	0.234	0.64	0.506	0.4	0.48	0.389	0.501
105	0.656	0.369	0.542	0.593	0.702	0.257	0.743	0.682	0.472	0.517	0.488	0.652
120	0.863	0.611	0.735	0.852	0.972	0.444	0.947	0.991	0.653	0.742	0.683	0.887
135	0.939	0.658	0.809	0.98	1.033	0.481	0.964	1.262	0.679	0.843	0.764	1.114
150	1.128	0.872	0.95	1.171	1.189	0.607	1.084	1.556	0.927	1.176	0.959	1.35
165	1.42	1.011	1.166	1.344	1.433	0.71	1.236	1.744	1.126	1.326	1.135	1.657
180	1.745	1.114	1.449	1.542	1.686	0.898	1.433	2.008	1.266	1.593	1.258	2.002
195	2.064	1.273	1.714	1.882	1.858	1.145	1.623	2.3	1.38	1.926	1.444	2.199
210	2.372	1.407	1.958	2.038	2.099	1.253	1.793	2.602	1.527	2.169	1.543	2.488
Figure 5N
	mCherry						hM4Di-mCherry
Time	Mouse 1	Mouse 2	Mouse 3	Mouse 4	Mouse 5	Mouse 6	Mouse 1	Mouse 2	Mouse 3	Mouse 4	Mouse 5	Mouse 6
0	0	0	0	0	0	0	0	0	0	0	0	0
15	0.019	0.056	0.024	0.072	0.007	0.044	0.039	0.005	0.095	0.024	0.05	0.004
30	0.037	0.096	0.045	0.128	0.022	0.121	0.075	0.014	0.208	0.051	0.093	0.013
45	0.053	0.236	0.054	0.224	0.046	0.201	0.115	0.024	0.277	0.067	0.134	0.019
60	0.08	0.32	0.065	0.281	0.056	0.249	0.154	0.034	0.401	0.082	0.174	0.024
75	0.103	0.446	0.083	0.401	0.067	0.299	0.185	0.039	0.51	0.095	0.21	0.034
90	0.13	0.516	0.094	0.493	0.086	0.389	0.206	0.044	0.64	0.121	0.284	0.04
105	0.149	0.634	0.105	0.608	0.1	0.434	0.241	0.05	0.734	0.131	0.355	0.045
120	0.166	0.718	0.127	0.702	0.115	0.472	0.272	0.056	0.842	0.159	0.395	0.053
135	0.196	0.84	0.138	0.782	0.129	0.549	0.291	0.067	0.89	0.175	0.445	0.06
150	0.26	0.923	0.156	0.879	0.147	0.592	0.416	0.078	0.953	0.194	0.545	0.068
165	0.318	0.998	0.196	1.011	0.162	0.777	0.513	0.088	1.028	0.221	0.63	0.076
180	0.446	1.047	0.263	1.09	0.2	0.937	0.566	0.103	1.095	0.246	0.73	0.088
195	0.587	1.118	0.292	1.278	0.239	0.999	0.63	0.115	1.183	0.256	0.824	0.103
210	0.799	1.214	0.345	1.303	0.287	1.032	0.77	0.1323	1.263	0.278	0.885	0.111
