# Supplementary material for: A discrete parasubthalamic nucleus subpopulation plays a critical role in appetite suppression
Source: eLife. 2022 May 4;11:e75470. doi: 10.7554/eLife.75470 (PMC9119672; doi:10.7554/eLife.75470)
Supplement: Figure 6—source data 1. [file elife-75470-fig6-data1.xlsx]

## Sheet: Sheet1
Figure 6D
	mCherry					ChR2-mCherry
Time	Mouse 1	Mouse 2	Mouse 3	Mouse 4	Mouse 5	Mouse 1	Mouse 2	Mouse 3	Mouse 4	Mouse 5
0	0	0	0	0	0	0	0	0	0	0
10	0.31625	0.431429	0.218333	0.26	0.322857	0.256667	0.237143	0.368	0.452	0.294
20	0.64875	0.861429	0.393333	0.6025	0.531429	0.686667	0.601429	0.644	0.612	0.794
30	1.03875	1.23429	0.571667	0.895	0.888571	0.8	0.932857	0.922	0.918	1.272
40	1.32375	1.63429	0.855	1.03375	1.25571	0.94	1.23286	0.912	1.198	1.578
50	1.80125	2.05714	1.00833	1.3625	1.51429	0.931667	1.53286	1.34	1.42	2.026
60	2.39125	2.51286	1.385	1.74	1.66429	1.405	1.93429	1.808	1.87	2.172
70	2.69	2.90429	1.545	2.21875	2.05857	1.645	2.25857	2.058	2.246	2.352
80	3.06375	3.32	1.76333	2.56125	2.28714	1.82667	2.4	2.48	2.502	2.56
90	3.22	3.75857	1.93	2.76375	2.58286	1.86833	2.56857	2.566	2.544	2.702
100	3.30375	4.20857	2.335	3.08	2.60857	2.07833	2.75286	2.8	2.542	2.94
110	4.03375	4.60286	2.675	3.3575	2.92286	2.07167	2.96	2.842	2.944	2.938
120	4.40125	4.90429	2.88667	3.55	3.18286	2.06333	3.13714	2.946	3.204	2.938
130	4.70875	5.46571	3.27	4.1025	3.59286	2.57833	3.61857	3.824	3.688	2.94
140	4.98125	5.59143	3.43	4.4325	3.90286	2.725	3.93571	4.066	3.868	2.934
150	5.385	6.16857	3.60333	4.8425	4.10714	2.80667	4.25429	4.252	4.142	3.35
160	5.835	6.50143	3.945	5.29125	4.63571	3.195	4.61	4.392	4.452	3.79
170	6.085	6.81714	4.27667	5.6375	4.93714	3.19167	4.91571	4.722	4.554	4.102
180	6.37125	7.11857	4.61333	5.84875	5.37	3.675	5.18286	5.442	4.796	4.808
Figure 6E
	mCherry					ChR2-mCherry
	Mouse 1	Mouse 2	Mouse 3	Mouse 4	Mouse 5	Mouse 1	Mouse 2	Mouse 3	Mouse 4	Mouse 5
Pre	2.38625	2.51	1.39167	1.745	1.65857	1.405	1.93286	1.808	1.874	2.184
Stim	2.015	2.39286	1.49833	1.805	1.52714	0.651667	1.20429	1.142	1.338	0.762
Post	1.9675	2.22429	1.73	2.30125	2.18143	1.62167	2.04714	2.182	1.588	1.87
Figure 6F
	mCherry					ChR2-mCherry
Time	Mouse 1	Mouse 2	Mouse 3	Mouse 4	Mouse 5	Mouse 1	Mouse 2	Mouse 3	Mouse 4	Mouse 5
0	0	0	0	0	0	0	0	0	0	0
10	0.381	0.305	0.337	0.367	0.329	0.205	0.423	0.442	0.304	0.257
20	0.702	0.846	0.775	0.886	0.832	0.562	0.575	0.654	0.459	0.451
30	0.9665	1.35	0.831	1.265	1.114	0.964	0.768	1.041	0.896	0.964
40	1.354	1.743	1.215	1.365	1.353	1.453	1.265	1.257	1.16	1.362
50	1.46	1.964	1.363	1.655	1.577	1.987	1.895	1.554	1.37	1.785
60	1.887	2.226	2.103	1.704	1.946	2.444	2.315	1.722	1.677	2.081
70	2.216	2.365	2.65	2.315	2.315	2.956	2.564	2.162	2.005	2.311
80	2.78	2.652	2.95	2.557	2.798	3.156	2.974	2.875	2.63	2.651
90	3.052	3.005	3.265	2.798	3.162	3.445	3.32	2.996	2.96	3.017
100	3.221	3.415	3.465	3.05	3.763	3.873	3.67	3.204	3.21	3.774
110	3.526	3.975	3.756	3.106	4.131	4.267	4.18	3.51	3.57	4.217
120	3.906	4.402	3.811	3.842	4.251	4.691	4.81	3.621	3.713	4.77
130	4.331	5.464	4.16	3.965	4.52	5.016	5.27	4.063	4.17	5.175
140	4.423	5.651	4.685	4.16	4.692	5.334	5.937	4.252	4.336	5.664
150	4.775	5.831	5.168	4.964	5.321	6.303	6.406	4.683	4.7	6.048
160	4.843	6.227	5.536	5.225	5.478	6.578	6.555	5.437	4.852	6.21
170	5.284	6.398	6.15	5.422	5.575	6.921	6.773	5.735	5.137	6.387
180	5.506	6.444	6.649	5.684	5.746	7.279	6.991	5.993	5.381	6.452
Figure 6G
	mCherry					ChR2-mCherry
	Mouse 1	Mouse 2	Mouse 3	Mouse 4	Mouse 5	Mouse 1	Mouse 2	Mouse 3	Mouse 4	Mouse 5
Pre	1.887	2.226	2.103	1.904	1.946	2.444	2.315	1.722	1.677	2.081
Stim	2.019	2.176	1.708	2.138	2.305	2.247	2.495	1.899	2.036	2.689
Post	1.6	2.042	2.838	1.842	1.495	2.588	2.181	2.372	1.668	1.682
Figure 6K
	mCherry					hM3Dq-mCherry
Time	Mouse 1	Mouse 2	Mouse 3	Mouse 4	Mouse 5	Mouse 1	Mouse 2	Mouse 3	Mouse 4	Mouse 5
0	0	0	0	0	0	0	0	0	0	0
10	0.395	0.521	0.257	0.25	0.327	0.0423	0.032	0.104	0.091	0.062
20	0.725	0.724	0.374	0.669	0.629	0.088	0.067	0.362	0.144	0.133
30	0.98	0.143	0.682	0.966	0.911	0.137	0.155	0.402	0.343	0.204
40	1.275	0.154	0.975	1.114	1.215	0.255	0.352	0.874	0.503	0.431
50	1.976	2.254	1.045	1.256	1.425	0.374	0.452	0.977	0.778	0.516
60	2.265	2.674	1.32	1.821	1.78	0.478	0.527	1.365	0.953	0.655
70	2.74	3.056	1.46	2.232	1.95	0.526	0.667	1.784	1.106	0.745
80	3.084	3.56	1.828	2.47	2.095	0.593	0.877	2.045	1.264	0.823
90	3.195	4.126	2.14	2.845	2.301	0.772	0.952	2.243	1.563	0.974
100	3.742	4.427	2.673	3.151	2.37	0.8015	1.195	2.524	1.784	1.153
110	3.96	4.71	2.745	3.462	2.89	0.887	1.23	2.834	1.822	1.254
120	4.657	5.275	3.051	3.784	3.321	0.954	1.401	2.988	1.895	1.401
130	4.862	5.778	3.325	4.224	3.65	1.055	1.562	3.243	2.011	1.425
140	5.138	6.012	3.67	4.567	3.865	1.104	1.653	3.346	2.231	1.562
150	5.49	6.31	3.89	4.978	4.201	1.205	1.75	3.544	2.352	1.77
160	5.799	6.82	4.1267	5.632	4.435	1.392	1.892	3.778	2.454	1.824
170	6.224	7.026	4.425	5.983	4.853	1.447	1.992	3.901	2.52	1.879
180	6.417	7.211	4.841	6.254	5.024	1.51	2.106	3.908	2.68	2.001
Figure 6L
	mCherry					hM3Dq-mCherry
Time	Mouse 1	Mouse 2	Mouse 3	Mouse 4	Mouse 5	Mouse 1	Mouse 2	Mouse 3	Mouse 4	Mouse 5
0	0	0	0	0	0	0	0	0	0	0
10	0.51	0.291	0.26	0.453	0.356	0.214	0.468	0.42	0.467	0.277
20	0.874	0.526	0.563	0.654	0.762	0.741	0.654	0.635	0.895	0.764
30	1.213	0.877	0.894	0.848	1.114	0.981	0.976	0.965	1.254	1.104
40	1.671	1.245	1.169	1.267	1.753	1.415	1.265	1.452	1.835	1.431
50	2.354	1.734	1.435	1.682	2.543	1.754	1.887	1.623	2.354	1.876
60	2.576	2.242	1.778	1.963	2.974	2.051	2.254	1.896	2.785	2.04
70	2.867	2.657	2.027	2.351	3.472	2.478	2.526	2.314	3.126	2.453
80	3.125	3.001	2.65	2.796	3.887	3.065	2.889	2.564	3.536	2.955
90	3.356	3.267	2.965	3.367	4.272	3.61	3.116	2.671	3.821	3.252
100	3.768	2.582	3.57	3.621	4.874	4.256	3.546	2.785	4.526	3.875
110	4.085	2.728	4.005	3.829	5.532	4.782	3.985	3.042	4.873	4.332
120	4.653	3.574	4.487	3.993	5.893	5.213	4.35	3.253	5.311	4.776
130	4.86	4.062	4.984	4.265	6.117	5.873	4.789	3.675	5.893	5.348
140	5.146	4.377	5.226	4.562	6.332	6.164	5.216	3.998	6.268	5.924
150	5.35	4.786	5.789	4.779	6.843	6.542	5.632	4.203	6.664	6.342
160	5.789	5.021	6.215	4.899	6.915	6.874	5.889	4.566	6.973	6.788
170	6.023	5.175	6.556	5.011	7.228	7.062	6.215	4.773	7.26	6.996
180	6.422	5.487	6.956	5.211	7.437	7.236	6.52	5.097	7.403	7.222
