# Supplementary material for: A discrete parasubthalamic nucleus subpopulation plays a critical role in appetite suppression
Source: eLife. 2022 May 4;11:e75470. doi: 10.7554/eLife.75470 (PMC9119672; doi:10.7554/eLife.75470)
Supplement: Figure 8—source data 1. [file elife-75470-fig8-data1.xlsx]

## Sheet: Sheet1
Figure 8C
	mCherry					ChR2-mCherry
Time	Mouse 1	Mouse 2	Mouse 3	Mouse 4	Mouse 5	Mouse 1	Mouse 2	Mouse 3	Mouse 4	Mouse 5
0	0	0	0	0	0	0	0	0	0	0
10	0.518	0.266	0.312	0.692	0.284	0.284	0.529	0.691	0.596	0.56
20	0.744	0.657	0.669	1.185	0.611	0.624	0.651	1.229	1.014	1.195
30	1.321	1.087	1.057	1.448	0.838	1.107	1.015	1.484	1.521	1.403
40	1.685	1.562	1.461	1.633	1.304	1.315	1.339	1.632	1.679	1.702
50	2.053	2.111	2.015	2.057	1.896	1.835	1.482	1.911	1.962	1.941
60	2.317	2.243	2.56	2.451	2.204	2.138	1.697	2.06	2.429	2.326
70	2.638	2.359	2.912	2.672	2.633	2.45	2.163	2.433	2.737	2.966
80	2.805	2.918	3.322	3.1	3.097	2.79	2.693	2.782	2.942	3.109
90	3.228	3.156	3.812	3.317	3.632	2.962	2.994	3.174	3.344	3.341
100	3.448	3.248	4.361	3.592	3.724	3.226	3.129	3.457	3.735	3.866
110	3.692	3.852	4.529	3.94	3.81	3.573	3.397	3.617	4.138	4.035
120	4.388	4.307	4.859	4.286	4.434	3.924	4.014	4.062	4.523	4.637
130	4.82	4.619	5.15	4.828	4.682	4.273	4.208	4.542	4.846	5.281
140	4.997	5.196	5.5	5.348	5.161	4.481	4.591	4.723	5.053	5.87
150	5.407	5.617	5.853	5.503	5.48	4.969	5.002	5.423	5.315	6.168
160	5.792	6.062	6.288	5.921	5.825	5.251	5.416	5.877	5.911	6.323
170	6.13	6.248	6.854	6.446	6.058	5.658	5.715	6.291	6.052	6.49
180	6.501	6.647	7.201	6.825	6.2	5.818	6.254	6.689	6.142	6.775
Figure 8D
	mCherry					ChR2-mCherry
	Mouse 1	Mouse 2	Mouse 3	Mouse 4	Mouse 5	Mouse 1	Mouse 2	Mouse 3	Mouse 4	Mouse 5
Pre	2.317	2.243	2.56	2.451	2.204	2.138	1.697	2.06	2.429	2.326
Stim	2.071	2.064	2.299	1.835	2.23	1.786	2.317	2.002	2.094	2.311
Post	2.113	2.34	2.342	2.539	1.766	1.894	2.24	2.627	1.619	2.138
Figure 8G
	mCherry					ChR2-mCherry
Time	Mouse 1	Mouse 2	Mouse 3	Mouse 4	Mouse 5	Mouse 1	Mouse 2	Mouse 3	Mouse 4	Mouse 5
0	0	0	0	0	0	0	0	0	0	0
10	0.445	0.083	0.255	0.207	0.086	0.236	0.277	0.396	0.601	0.281
20	1.12	0.341	0.36	0.485	0.558	0.68	0.494	0.942	0.812	0.89
30	1.586	0.58	0.782	0.722	1.086	1.014	0.584	1.167	0.997	1.342
40	2.025	0.899	0.894	0.864	1.426	1.248	0.826	1.462	1.11	1.83
50	2.357	1.412	1.299	1.063	1.507	1.372	0.971	2.051	1.231	2.399
60	2.727	1.792	1.865	1.486	1.739	1.968	1.343	2.423	1.633	2.544
70	3.218	1.923	2.238	2	2.298	2.135	1.561	2.505	1.721	2.79
80	3.424	2.467	2.624	2.309	2.689	2.442	1.873	2.726	1.936	2.992
90	3.652	2.94	2.802	2.637	2.86	2.586	2.185	3.091	2.054	3.324
100	3.803	3.208	3.423	2.824	3.304	2.724	2.462	3.285	2.11	3.387
110	4.361	3.689	3.863	2.951	3.555	3.309	2.565	3.414	2.335	3.495
120	4.918	3.87	4.19	3.162	4.008	3.732	2.756	3.543	2.39	3.826
130	5.498	4.121	4.428	3.311	4.346	4.228	2.873	3.769	2.622	4.152
140	6.177	4.688	4.552	3.507	4.734	4.762	3.162	4.249	3.175	4.582
150	6.322	5.29	4.659	3.766	5.083	5.308	3.526	4.855	3.704	4.69
160	6.765	5.506	4.861	4.239	5.403	5.863	3.903	5.019	4.023	5.094
170	7.357	5.831	5.294	4.679	5.652	6.052	4.395	5.555	4.124	5.336
180	7.638	6.271	5.546	4.953	5.854	6.33	4.89	5.708	4.685	6.003
Figure 8H
	mCherry					ChR2-mCherry
	Mouse 1	Mouse 2	Mouse 3	Mouse 4	Mouse 5	Mouse 1	Mouse 2	Mouse 3	Mouse 4	Mouse 5
Pre	2.727	1.792	1.865	1.486	1.739	1.968	1.343	2.423	1.633	2.544
Stim	2.191	2.078	2.325	1.676	2.269	1.764	1.413	1.12	0.757	1.282
Post	2.72	2.401	1.356	1.791	1.846	2.598	2.134	2.165	2.295	2.177
Figure 8K
	mCherry					ChR2-mCherry
Time	Mouse 1	Mouse 2	Mouse 3	Mouse 4	Mouse 5	Mouse 1	Mouse 2	Mouse 3	Mouse 4	Mouse 5
0	0	0	0	0	0	0	0	0	0	0
10	0.32	0.147	0.247	0.538	0.487	0.452	0.178	0.191	0.378	0.582
20	0.628	0.328	0.911	0.846	0.856	0.754	0.345	0.595	0.963	0.692
30	0.784	0.932	1.523	1.436	1.459	0.953	0.681	1.197	1.515	1.134
40	1.46	1.359	2.123	1.567	1.706	1.561	1.121	1.702	2.078	1.392
50	1.618	1.559	2.342	1.762	2.209	1.82	1.71	2.042	2.486	1.956
60	2.313	1.905	2.885	2.023	2.405	2.006	1.917	2.326	2.864	2.374
70	2.603	2.104	3.177	2.107	2.638	2.259	2.011	2.577	3.181	2.533
80	2.961	2.504	3.404	2.595	2.903	2.434	2.347	3.003	3.264	2.689
90	3.327	2.862	3.945	3.171	3.584	2.682	2.563	3.233	3.494	2.909
100	3.78	3.115	4.382	3.509	4.031	2.944	2.828	3.61	3.668	2.959
110	4.323	3.479	4.944	3.838	4.363	3.273	2.952	3.779	3.886	3.163
120	4.915	3.943	5.427	4.41	4.924	3.339	3.042	4.229	3.976	3.241
130	5.474	4.119	5.832	4.877	5.447	3.926	3.468	4.431	4.475	3.399
140	5.607	4.488	6.055	5.003	6.075	4.265	3.841	5.022	4.825	3.893
150	5.991	4.772	6.66	5.39	6.285	4.446	4.315	5.53	5.261	4.181
160	6.209	4.973	6.959	5.929	6.909	4.576	4.406	6.095	5.372	4.314
170	6.772	5.439	7.441	6.157	7.574	4.729	4.757	6.412	5.469	4.41
180	7.25	5.939	7.657	6.773	7.778	5.244	4.864	6.786	5.891	4.498
Figure 8L
	mCherry					ChR2-mCherry
	Mouse 1	Mouse 2	Mouse 3	Mouse 4	Mouse 5	Mouse 1	Mouse 2	Mouse 3	Mouse 4	Mouse 5
Pre	2.313	1.905	2.885	2.023	2.405	2.006	1.917	2.326	2.864	2.374
Stim	2.602	2.038	2.542	2.387	2.519	1.333	1.125	1.903	1.112	0.867
Post	2.335	1.996	2.23	2.363	2.854	1.905	1.822	2.557	1.915	1.257
Figure 8O
	mCherry					ChR2-mCherry
Time	Mouse 1	Mouse 2	Mouse 3	Mouse 4	Mouse 5	Mouse 1	Mouse 2	Mouse 3	Mouse 4	Mouse 5
0	0	0	0	0	0	0	0	0	0	0
10	0.366667	0.4	0.116667	0.411667	0.4175	0.262	0.608	0.684	0.246	0.503333
20	0.585	1.018	0.698333	0.73	0.825	0.566	1.05	1.198	0.75	0.746667
30	0.853333	1.244	1.00833	0.996667	1.13875	0.994	1.302	1.46	0.982	1.11333
40	1.445	1.722	1.19667	1.47	1.53875	1.594	1.656	1.924	1.38	1.35
50	1.9	1.996	1.58	2.06	1.68125	2.114	1.802	2.548	1.592	1.72333
60	2.16833	2.504	1.92	2.605	2.045	2.404	2.406	2.712	2.086	2.155
70	2.43333	2.982	2.10667	3.22833	2.2725	2.958	2.762	3.04	2.258	2.40167
80	2.855	3.212	2.365	3.55833	2.7575	3.254	3.082	3.17	2.348	2.77333
90	3.65167	3.532	2.89	4.08333	3.01	3.358	3.358	3.666	2.452	3.135
100	3.92167	4.078	3.13667	4.28	3.475	3.524	3.614	3.95	2.834	3.22167
110	4.265	4.566	3.315	4.68833	3.6725	3.61	3.746	4.306	3.38	3.34167
120	4.43167	5.148	3.69833	5.125	4.15125	4.036	3.838	4.596	3.544	3.67167
130	5.12333	5.664	4.08	5.39667	4.40375	4.464	4.046	4.99	3.876	3.88
140	5.47333	6.004	4.61	5.69833	4.725	4.812	4.548	5.372	4.088	3.935
150	5.94167	6.336	4.86833	6.21167	5.115	4.944	5.172	5.708	4.152	4.83833
160	6.485	6.706	5.16333	6.56833	5.44375	5.346	5.292	5.974	4.61	4.96167
170	6.83667	7.26	5.61667	6.99833	5.685	5.84	5.71	6.346	4.992	5.515
180	7.04	7.622	6.095	7.595	6.13875	6.136	5.998	6.792	5.048	5.76833
Figure 8P
	mCherry					ChR2-mCherry
	Mouse 1	Mouse 2	Mouse 3	Mouse 4	Mouse 5	Mouse 1	Mouse 2	Mouse 3	Mouse 4	Mouse 5
Pre	2.17	2.51	1.91667	2.60333	2.045	2.408	2.406	2.716	2.078	2.15167
Stim	2.26167	2.64	1.77833	2.52667	2.10625	1.624	1.438	1.894	1.458	1.51667
Post	2.605	2.474	2.40333	2.46667	1.9875	2.1	2.162	2.188	1.512	2.09667
Figure 8S
	mCherry					ChR2-mCherry
Time	Mouse 1	Mouse 2	Mouse 3	Mouse 4	Mouse 5	Mouse 1	Mouse 2	Mouse 3	Mouse 4	Mouse 5
0	0	0	0	0	0	0	0	0	0	0
10	0.163	0.305	0.255	0.365	0.425	0.342	0.492	0.519	0.195	0.131
20	0.477	0.579	0.582	0.955	1.065	0.531	0.663	0.71	0.791	0.679
30	0.74	1.078	1.095	1.313	1.527	0.991	1.128	1.137	1.026	1.063
40	1.037	1.666	1.672	1.583	1.825	1.19	1.624	1.267	1.242	1.241
50	1.689	2.048	1.904	1.733	2.208	1.492	2.285	1.654	1.567	1.612
60	2.352	2.213	2.204	2.02	2.453	2.166	2.809	2.032	1.809	2.002
70	2.823	2.719	2.378	2.324	2.85	2.432	3.129	2.419	2.007	2.117
80	3.335	3.316	2.685	2.511	2.996	2.832	3.323	2.626	2.233	2.64
90	3.647	3.656	3.23	3.139	3.368	3.209	3.617	2.681	2.38	2.805
100	3.928	4.09	3.613	3.286	3.771	3.522	3.951	3.116	2.472	2.996
110	4.597	4.581	4.054	3.934	4.085	3.903	4.114	3.308	2.791	3.29
120	5.083	4.785	4.664	4.232	4.175	4.205	4.28	3.664	3.055	3.704
130	5.563	5.355	5.141	4.398	4.32	4.554	4.534	3.911	3.42	4.014
140	5.755	5.583	5.491	4.679	4.627	4.869	5.122	4.206	3.585	4.597
150	6.266	5.759	5.962	4.98	5.094	5.144	5.473	4.719	4.134	4.867
160	6.507	5.871	6.447	5.359	5.297	5.751	6.025	5.12	4.503	5.154
170	6.801	6.289	6.953	5.816	5.892	6.381	6.267	5.487	5.019	5.487
180	7.455	6.859	7.071	6.39	6.307	6.759	6.91	5.898	5.431	5.979
Figure 8T
	mCherry					ChR2-mCherry
	Mouse 1	Mouse 2	Mouse 3	Mouse 4	Mouse 5	Mouse 1	Mouse 2	Mouse 3	Mouse 4	Mouse 5
Pre	2.352	2.213	2.204	2.02	2.453	2.166	2.809	2.032	1.809	2.002
Stim	2.731	2.572	2.46	2.212	1.722	2.039	1.471	1.632	1.246	1.702
Post	2.372	2.074	2.407	2.158	2.132	2.554	2.63	2.234	2.376	2.275
