# Supplementary material for: A discrete parasubthalamic nucleus subpopulation plays a critical role in appetite suppression
Source: eLife. 2022 May 4;11:e75470. doi: 10.7554/eLife.75470 (PMC9119672; doi:10.7554/eLife.75470)
Supplement: Supplementary file 1. [file elife-75470-supp1.xlsx]

## Sheet: Sheet1
Supplementary Table 1: Supplementary Statistical Analysis
Figure	Sample Size	Statistical Analysis
3C	n=4 mice	Two-way ANOVA: significant interaction of cell type x feeding conditions: F1,12 = 16.11, p = 0.0017. Bonferroni post-hoc analysis shows significant differences as indicated.
3D	n=4 mice	Student's t-test (unpaired, two-tailed): t6 = 5.533, p = 0.0015.
3K	n=6 mice	One-way repeated measures ANOVA: significant effect of stimulus condition: F6,30 = 43.67, p < 0.0001. Bonferroni post-hoc analysis shows significant differences as indicated.
3L	n=6 mice	One-way repeated measures ANOVA: significant effect of stimulus condition: F6,30 = 25.56, p < 0.0001. Bonferroni post-hoc analysis shows significant differences as indicated.
4E	n=4 mice	Two-way ANOVA: significant interaction of cell type x hormones: F3,24 = 3.019, p = 0.0495. Bonferroni post-hoc analysis shows significant differences as indicated.
4K	n=6 mice	One-way repeated measures ANOVA: significant effect of hormone condition: F3,15 = 13.84, p = 0.0001. Bonferroni post-hoc analysis shows significant differences as indicated.
4L	n=6 mice	One-way repeated measures ANOVA: significant effect of hormone condition: F3,15 = 20.66, p < 0.0001. Bonferroni post-hoc analysis shows significant differences as indicated.
5D	n=6 mice	Two-way repeated measures ANOVA: no significant interaction of time x transgene: F14,70 = 1.738, p = 0.0672.
5E	n=6 mice	Two-way repeated measures ANOVA: significant interaction of time x transgene: F14,70 = 7.617, p < 0.0001. Bonferroni post-hoc analysis shows significant differences as indicated.
5F	n=6 mice	Two-way repeated measures ANOVA: significant interaction of time x transgene: F14,70 = 5.332, p < 0.0001. Bonferroni post-hoc analysis shows significant differences as indicated.
5G	n=6 mice	Two-way repeated measures ANOVA: significant interaction of time x transgene: F14,70 = 8.421, p < 0.0001. Bonferroni post-hoc analysis shows significant differences as indicated.
5H	n=6 mice	Two-way repeated measures ANOVA: no significant interaction of hormone condition x transgene: F3,15 = 0.7227, p = 0.5540.
5I	n=6 mice	Two-way repeated measures ANOVA: no significant interaction of hormone condition x transgene: F3,15 = 0.5623, p = 0.6481.
5J	n=6 mice	Two-way repeated measures ANOVA: significant interaction of hormone condition x transgene: F3,15 = 4.670, p = 0.0170. Bonferroni post-hoc analysis shows significant differences as indicated.
5K	n=6 mice	Two-way repeated measures ANOVA: no significant interaction of time x transgene: F14,70 = 0.1535, p = 0.9998.
5L	n=6 mice	Two-way repeated measures ANOVA: no significant interaction of time x transgene: F14,70 = 0.4719, p = 0.9407.
5M	n=6 mice	Two-way repeated measures ANOVA: no significant interaction of time x transgene: F14,70 = 0.4635, p = 0.9448.
5N	n=6 mice	Two-way repeated measures ANOVA: no significant interaction of time x transgene: F14,70 = 0.5147, p = 0.9168.
6D	n=5 mice	Two-way repeated measures ANOVA: significant interaction of time x transgene: F18,72 = 5.323, p < 0.0001. Bonferroni post-hoc analysis shows significant differences as indicated.
6E	n=5 mice	Two-way repeated measures ANOVA: significant interaction of time x transgene: F2,8 = 5.262, p = 0.0348. Bonferroni post-hoc analysis shows significant differences as indicated.
6F	n=5 mice	Two-way repeated measures ANOVA: no significant interaction of time x transgene: F18,72 = 1.698, p = 0.0596.
6G	n=5 mice	Two-way repeated measures ANOVA: no significant interaction of time x transgene: F2,8 = 0.5324, p = 0.6066. Bonferroni post-hoc analysis shows significant differences as indicated.
6K	n=5 mice	Two-way repeated measures ANOVA: significant interaction of time x transgene: F18,72 = 12.66, p < 0.0001. Bonferroni post-hoc analysis shows significant differences as indicated.
6L	n=5 mice	Two-way repeated measures ANOVA: no significant interaction of time x transgene: F18,72 = 0.4668, p = 0.9641.
8C	n=5 mice	Two-way repeated measures ANOVA: significant interaction of time x transgene: F18,72 = 5.212, p < 0.0001. Bonferroni post-hoc analysis shows significant differences as indicated.
8D	n=5 mice	Two-way repeated measures ANOVA: significant interaction of time x transgene: F2,8 = 6.732, p = 0.0193. Bonferroni post-hoc analysis shows significant differences as indicated.
8G	n=5 mice	Two-way repeated measures ANOVA: significant interaction of time x transgene: F18,72 = 4.550, p < 0.0001. Bonferroni post-hoc analysis shows significant differences as indicated.
8H	n=5 mice	Two-way repeated measures ANOVA: significant interaction of time x transgene: F2,8 = 10.22, p = 0.0063. Bonferroni post-hoc analysis shows significant differences as indicated.
8K	n=5 mice	Two-way repeated measures ANOVA: significant interaction of time x transgene: F18,72 = 10.24, p < 0.0001. Bonferroni post-hoc analysis shows significant differences as indicated.
8L	n=5 mice	Two-way repeated measures ANOVA: significant interaction of time x transgene: F2,8 = 5.803, p = 0.0277. Bonferroni post-hoc analysis shows significant differences as indicated.
8O	n=5 mice	Two-way repeated measures ANOVA: significant interaction of time x transgene: F18,72 = 7.051, p < 0.0001. Bonferroni post-hoc analysis shows significant differences as indicated.
8P	n=5 mice	Two-way repeated measures ANOVA: significant interaction of time x transgene: F2,8 = 6.437, p < 0.0216. Bonferroni post-hoc analysis shows significant differences as indicated.
8S	n=5 mice	Two-way repeated measures ANOVA: no significant interaction of time x transgene: F18,72 = 1.567, p = 0.0928.
8T	n=5 mice	Two-way repeated measures ANOVA: no significant interaction of time x transgene: F2,8 = 0.3862, p = 0.6916.
